# Supplementary material for: PFKFB3 gene deletion in endothelial cells inhibits intraplaque angiogenesis and lesion formation in a murine model of venous bypass grafting
Source: PubMed Central journal article supplement (PMC8813728; doi:10.1007/s10456-021-09816-3), 2021-08-25
Supplement: 10456_2021_9816_MOESM1_ESM.pdf [file 10456_2021_9816_MOESM1_ESM.pdf]

# Supplemental material

## **PFKFB3 gene deletion in endothelial cells inhibits intraplaque angiogenesis and lesion formation in a murine model of venous bypass grafting**

Paola Perrotta<sup>1</sup>, Margreet R. de Vries<sup>2</sup>, Bart Peeters<sup>3</sup>, Pieter-Jan Guns<sup>1</sup>, Guido R.Y. De Meyer<sup>1</sup>, Paul H.A. Quax<sup>2</sup> and Wim Martinet<sup>1</sup>

<sup>1</sup>Laboratory of Physiopharmacology, University of Antwerp, Belgium

<sup>2</sup>Department of Surgery, Leiden University Medical Center, Leiden, the Netherlands

<sup>3</sup>Antwerp University Hospital, Laboratory Medicine, Belgium

A

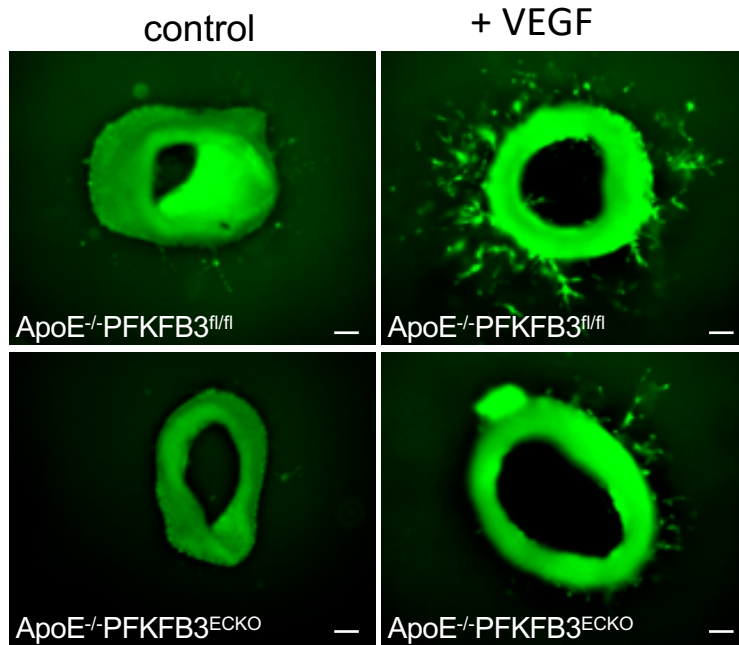

**Figure S1.** PFKFB3 deficiency in endothelial cells inhibits aortic sprouting. (A) Aortic rings from ApoE<sup>-/-</sup> PFKFB3<sup>fl/fl</sup> and ApoE<sup>-/-</sup> PFKFB3<sup>ECKO</sup> mice were embedded in collagen type I and treated with Opti-MEM supplemented with 2.5% FBS (control) in the presence or absence of vascular endothelial growth factor (VEGF, 50 ng/mL). At day 6, rings were fixed and stained to delineate endothelial cells. Images of ring sprouting were obtained and quantified. Scale bar = 500  $\mu$ m. (B) Sprouts were quantified, n=4 mice. \*\*\*P<0.0001 Two-way ANOVA, effect of PFKFB3<sup>ECKO</sup>: \*\*P<0.005, effect of VEGF: \*\*\*P<0.0001.

A

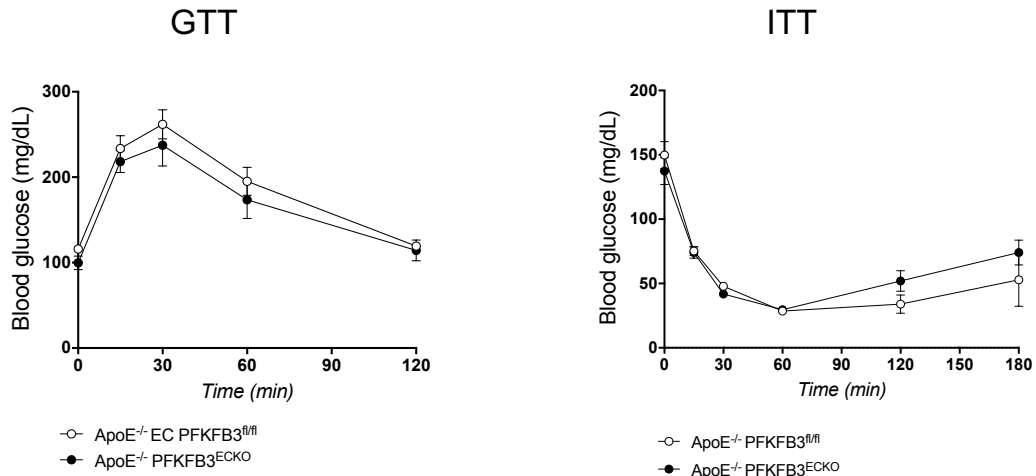

**Figure S2.** Glucose clearance in ApoE<sup>-/-</sup>PFKFB3<sup>fl/fl</sup> and ApoE<sup>-/-</sup>PFKFB3<sup>ECKO</sup> mice after intraperitoneal injection with glucose or insulin. A glucose tolerance test (GTT) and insulin tolerance test (ITT) was performed after 12 weeks of western diet. Blood glucose was measured at different time points after injection of glucose (1 g/kg, i.p.) or insulin (1 U/kg, i.p.).

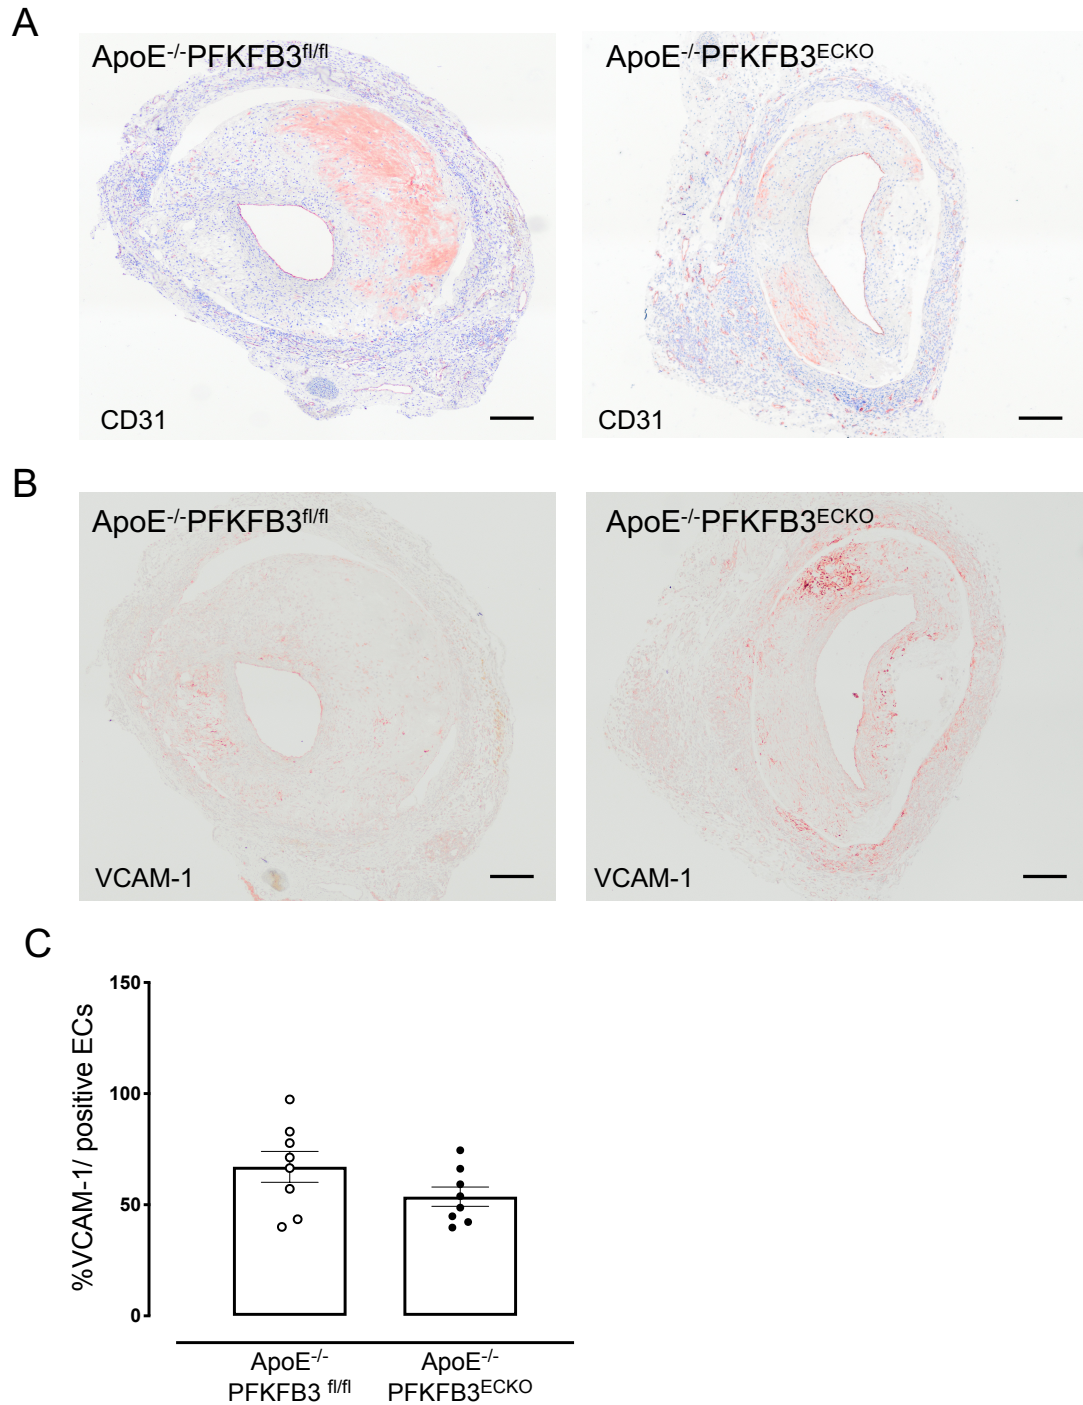

**Figure S3.** PFKFB3 deficiency in endothelial cells does not influence vascular cell adhesion molecule-1 (VCAM-1) expression in vein graft lesions. (A-B) Immunohistochemical detection of endothelial cells in representative vein graft lesions of ApoE<sup>-/-</sup>PFKFB3<sup>fl/fl</sup> and ApoE<sup>-/-</sup>PFKFB3<sup>ECKO</sup> mice using CD31 and VCAM-1 antibody. Scale bar = 200  $\mu$ m. (C) Quantification of VCAM-1 positive endothelial cells in vein graft lesions of ApoE<sup>-/-</sup>PFKFB3<sup>fl/fl</sup> and ApoE<sup>-/-</sup>PFKFB3<sup>ECKO</sup> mice (Independent samples t test, n=8).
